# Supplementary material for: Machine learning and synthetic outcome estimation for individualised antimicrobial cessation
Source: PubMed Central journal article supplement (PMC9719971; doi:10.3389/fdgth.2022.997219), 2022-11-21
Supplement: Datasheet1.pdf [file Datasheet1.pdf]

***Supplementary Material***

# 1 SUPPLEMENTARY TABLES AND FIGURES

## 1.1 Figures

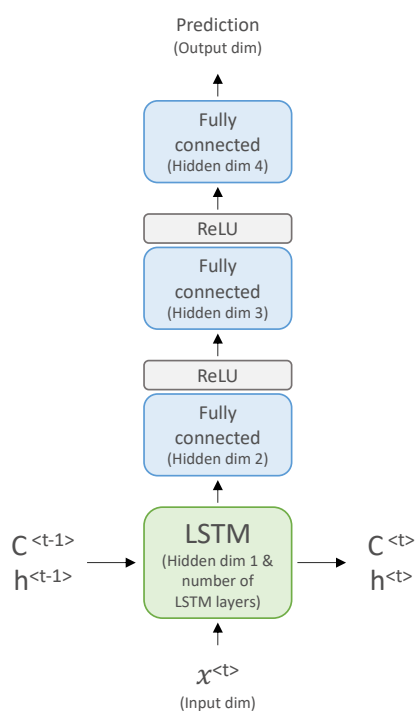

**Figure S1.** Overview of an LSTM cell within the autoencoder model for any given time-step. Dimension sizes are shown in S2. Note a final sigmoid activation function (not shown) is applied to the output for mortality prediction.

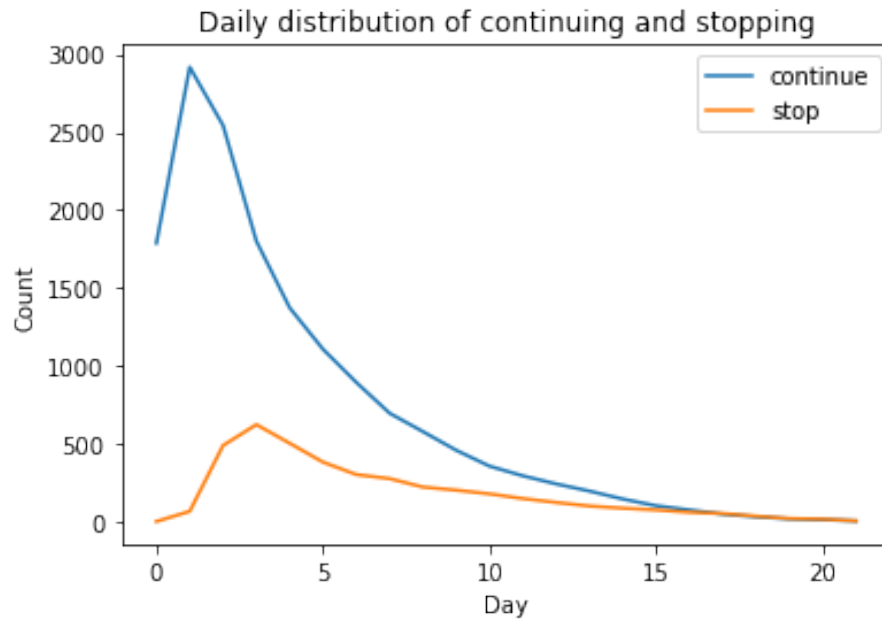

**Figure S2.** Distribution of continuing and stopping antibiotic treatment by day within the test dataset. Excluding the particular patient  $i$  whose outcomes are being investigated, those who continue on a given day are within the continue donor pool, while those that stop on that day are within the stop donor pool.

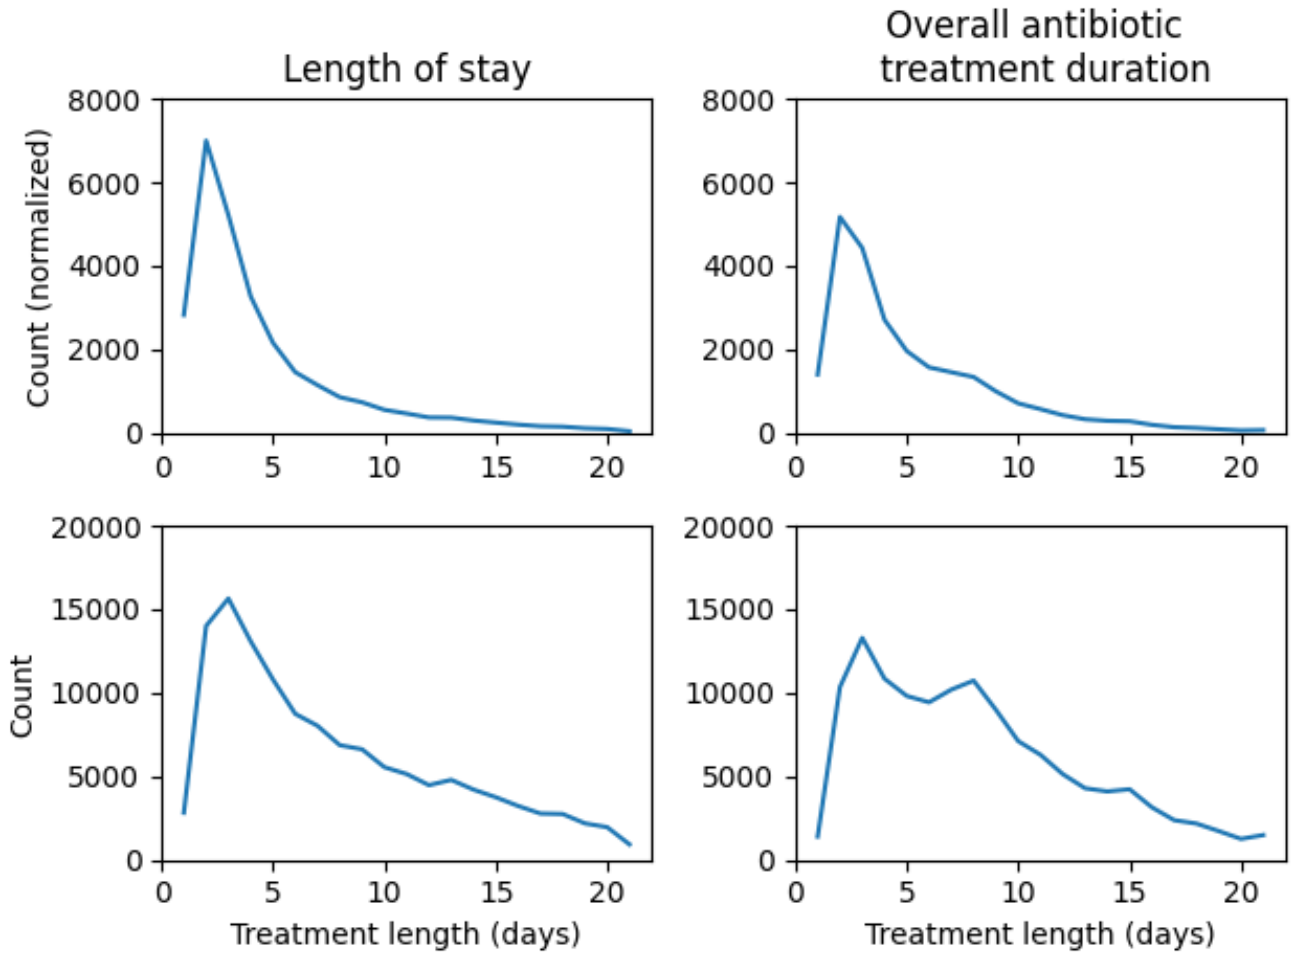

**Figure S3.** Overall antibiotic treatment duration and length of stay for patients. The normalised count represents the number of distinct occurrences for that specific day, while the raw count represents the number of days of data available.

## 1.2 Tables

Table S1. Autoencoder input features.

| Input variable                            | Degree of missingness (%) |
|-------------------------------------------|---------------------------|
| Glasgow Coma Score - Eye Opening          | 63.4                      |
| Glasgow Coma Score - Verbal Response      | 63.4                      |
| Glasgow Coma Score - Motor Response       | 63.4                      |
| Heart Rate                                | 55.3                      |
| Respiratory Rate                          | 55.6                      |
| O2 saturation pulseoxymetry               | 55.9                      |
| Temperature                               | 59.3                      |
| Foley                                     | 34.0                      |
| Base Excess                               | 54.9                      |
| Lactate                                   | 63.7                      |
| pCO2                                      | 55.0                      |
| pH                                        | 50.1                      |
| pO2                                       | 55.6                      |
| Alanine Aminotransferase (ALT) 0          | 66.6                      |
| Alkaline Phosphatase (ALP)                | 64.9                      |
| Asparate Aminotransferase (AST)           | 66.0                      |
| Anion Gap                                 | 5.8                       |
| Bicarbonate                               | 5.0                       |
| Bilirubin                                 | 66.7                      |
| Calcium                                   | 10.7                      |
| Chloride                                  | 4.8                       |
| Creatinine                                | 11.3                      |
| Glucose                                   | 8.6                       |
| Magnesium                                 | 8.8                       |
| Phosphate                                 | 12.2                      |
| Potassium                                 | 5.3                       |
| Sodium                                    | 5.6                       |
| Urea Nitrogen                             | 7.5                       |
| Hemoglobin                                | 4.7                       |
| Mean corpuscular hemoglobin (MCH)         | 6.2                       |
| Mean cell hemoglobin concentration (MCHC) | 4.5                       |
| Mean corpuscular volume (MCV)             | 5.6                       |
| Platelet Count                            | 6.2                       |
| Prothrombin time (PT)                     | 36.1                      |
| Partial thromboplastin time (PTT)         | 36.4                      |
| Red cell distribution width (RDW)         | 6.1                       |
| White Blood Cells                         | 6.8                       |
| Cumulative treatment length               | 0                         |
| Re-treatment                              | 0                         |
| Insurance                                 | 0                         |
| Ethnicity                                 | 0                         |
| Sex                                       | 0                         |
| Age                                       | 0                         |

Table S2. Model hyperparameters.

| Hyperparameter        | LOS model | Mortality model | Optimisation options         |
|-----------------------|-----------|-----------------|------------------------------|
| Learning rate         | 0.0001    | 0.00001         | 0.00001, 0.0001, 0.001, 0.01 |
| Batch size            | 512       | 512             | 32, 64, 128, 256, 512        |
| Input dimension       | 43        | 43              | -                            |
| Hidden dimension 1    | 128       | 128             | -                            |
| Hidden dimension 2    | 512       | 256             | 16, 32, 64, 128, 256, 512    |
| Hidden dimension 3    | 256       | 128             | 16, 32, 64, 128, 256, 512    |
| Hidden dimension 4    | 2         | 2               | -                            |
| Output dimension      | 1         | 1               | -                            |
| Number of LSTM layers | 5         | 2               | 1, 2, 3, 4, 5                |
| Bidirectional encoder | True      | True            | True, False                  |
| Activation function   | ReLU      | ReLU            | -                            |
